# Supplementary material
Source: Research Square preprint supplement (doi:10.21203/rs.3.rs-9233004/v1)
Supplement: Supplementary file 1 [file 1577ce02b81862e6346c7abc.pdf]

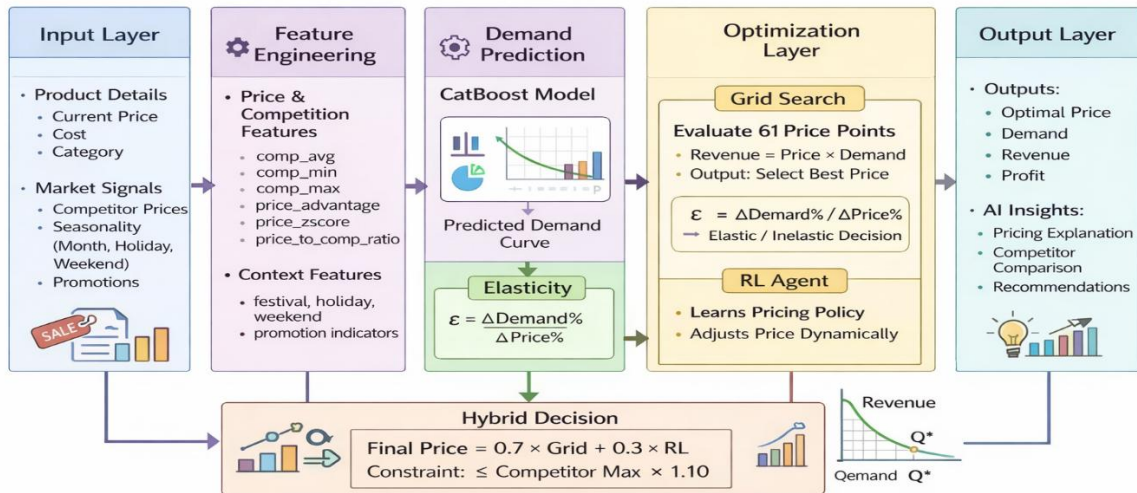

## A Hybrid Demand Forecasting and Adaptive Optimization Approach for Dynamic Pricing in E-Commerce
